# Supplementary material for: Preparation of TiO2/VOx, TiO2/SiO2, and VOx/SiO2 nanostructures by hydrothermal methods and determination of their magnetic properties
Source: Royal Society of Chemistry journal article supplement (doi:10.1039/d2nj05031e), 2023-01-01
Supplement: d2nj05031e1.pdf [file d2nj05031e1.pdf]

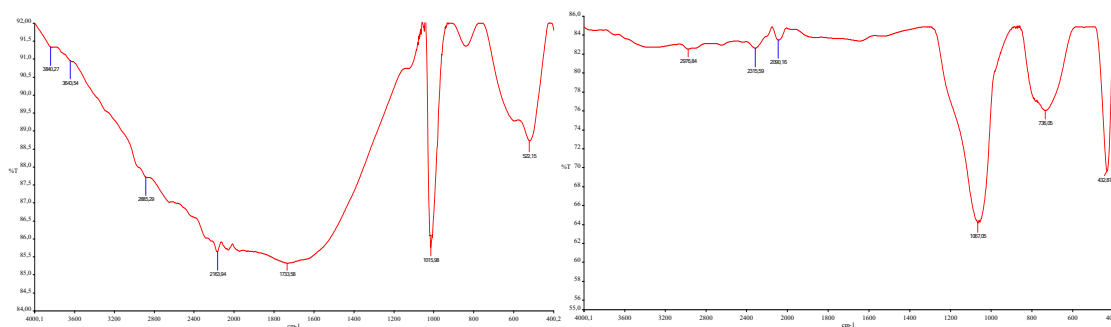

1

2

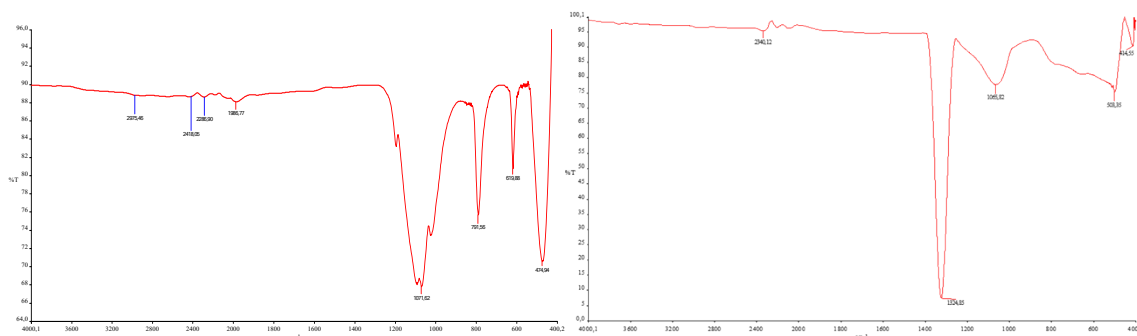

3

4

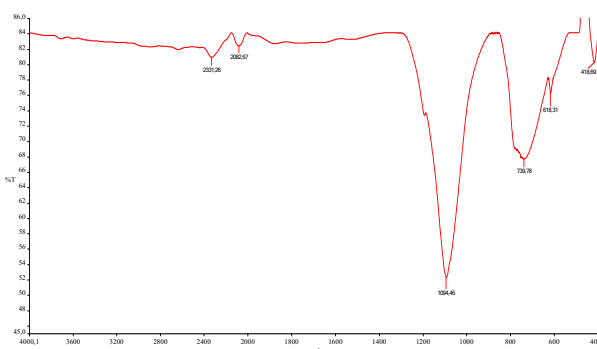

5

S.1. FTIR spectra of the synthesized nanocomposites (1-5)

**eZAF Smart Quant Results**

| Element | Weight % | Atomic % | Net Int. |
|---------|----------|----------|----------|
| O K     | 27.9     | 54       | 127.77   |
| SiK     | 0.29     | 0.32     | 14.8     |
| TiK     | 52.66    | 34.04    | 1749.03  |
| V K     | 19.14    | 11.64    | 515.61   |

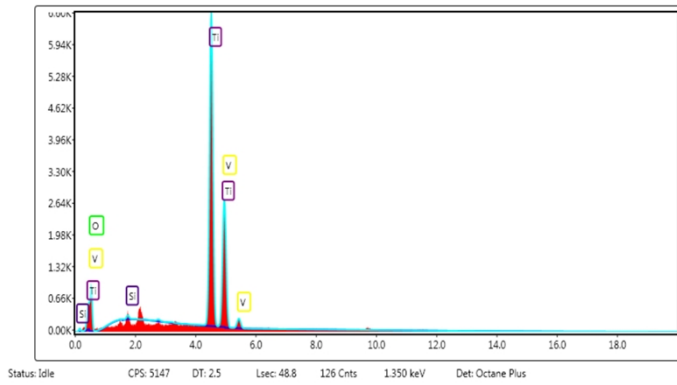

1

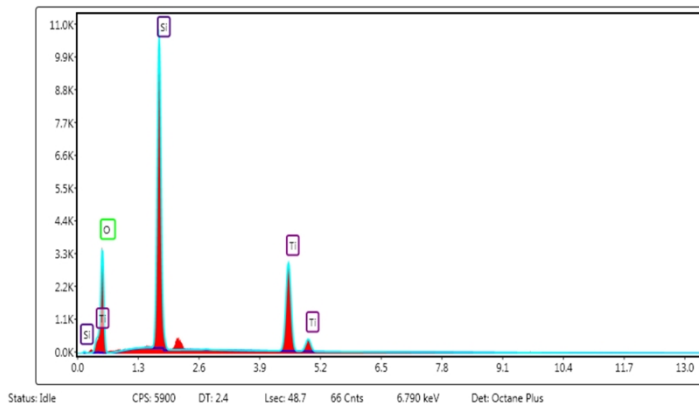

### eZAF Smart Quant Results

| Element | Weight % | Atomic % | Net Int. |
|---------|----------|----------|----------|
| O K     | 47.75    | 66.01    | 539.48   |
| Si K    | 30.27    | 23.84    | 2056.84  |
| Ti K    | 21.98    | 10.15    | 799.24   |

2

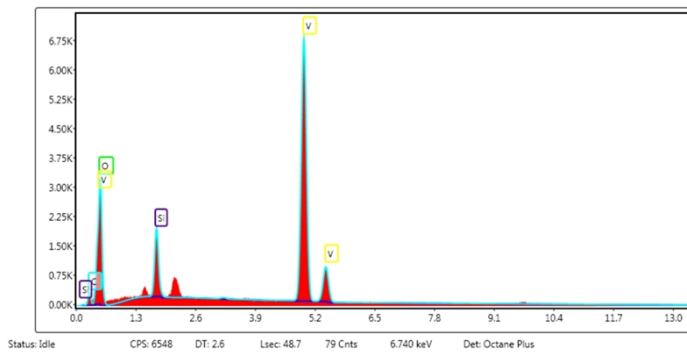

### eZAF Smart Quant Results

| Element | Weight % | Atomic % | Net Int. |
|---------|----------|----------|----------|
| O K     | 31.83    | 53.54    | 229.58   |
| Si K    | 5.6      | 5.37     | 342.33   |
| V K     | 57.88    | 30.58    | 1883.21  |

3

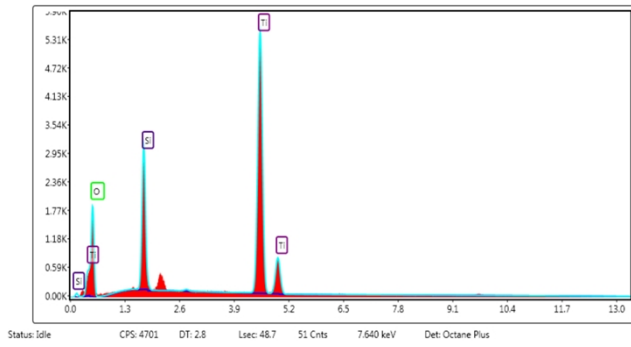

### eZAF Smart Quant Results

| Element | Weight % | Atomic % | Net Int. |
|---------|----------|----------|----------|
| O K     | 44.39    | 67.79    | 291.71   |
| Si K    | 10.71    | 9.31     | 585.29   |
| Ti K    | 44.9     | 22.9     | 1465.67  |

4

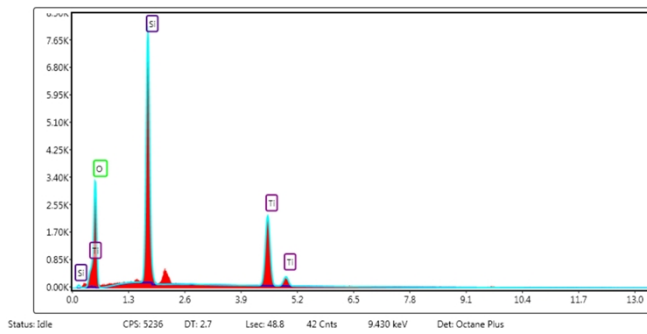

### eZAF Smart Quant Results

| Element | Weight % | Atomic % | Net Int. |
|---------|----------|----------|----------|
| O K     | 51.95    | 69.62    | 509.62   |
| Si K    | 28.12    | 21.46    | 1523.7   |
| Ti K    | 19.93    | 8.92     | 583.22   |

5

## S.2. EDS graphs for the synthesized nanocomposites (1-5)
